# Supplementary material for: MiR-378a-3p Is Critical for Burkitt Lymphoma Cell Growth
Source: PubMed Central journal article supplement (PMC7760147; doi:10.3390/cancers12123546), 2020-11-27
Supplement: cancers-12-03546-s001.pdf [file cancers-12-03546-s001.pdf]

# Supplementary Materials: MiR-378a-3p Is Critical for Burkitt Lymphoma Cell Growth

Fubiao Niu, Agnieszka Dzikiewicz-Krawczyk, Jasper Koerts, Debora de Jong, Laura Wijenberg, Margot Fernandez Hernandez, Izabella Slezak-Prochazka, Melanie Winkle, Wierd Kooistra, Tineke van der Sluis, Bea Rutgers, Miente Martijn Terpstra, Klaas Kok, Joost Kluiver and Anke van den Berg

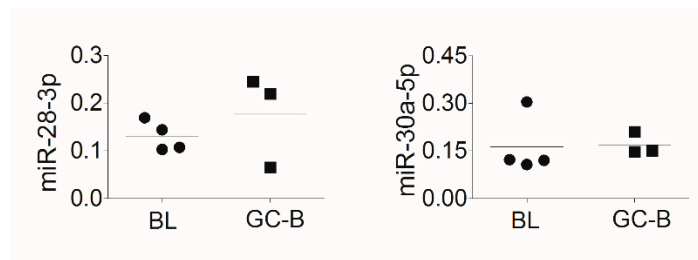

**Figure S1.** qRT-PCR validation of the differential expression pattern observed by small RNA-seq in the BL cell lines relative to GC-B cells. The decreased levels of miR-28-3p and miR-30a-5p in BL cell lines relative to GC-B cells could not be validated by qRT-PCR. miRNA levels were normalized to RNU44.

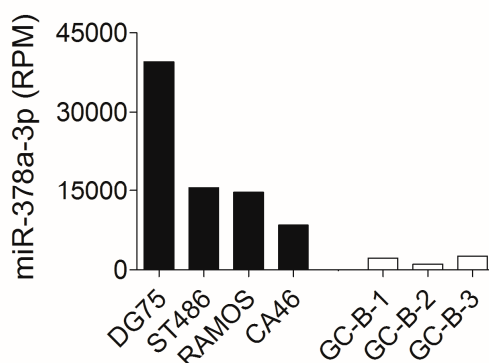

**Figure S2.** miR-378a-3p levels based on small RNA-seq data derived from individual BL cell lines (black bars) and germinal center B-cells (GC-B, white bars). RPM = reads per million.

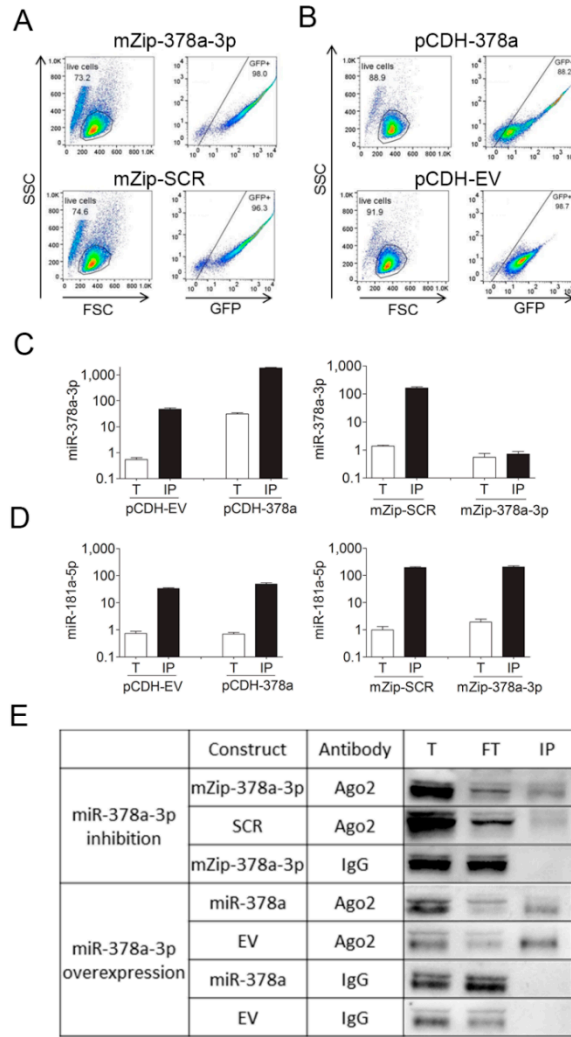

**Figure S3.** Validation of Ago2-IP procedure in ST486 cells upon inhibition and overexpression of miR-378a-3p. Infection efficiency for (A) miR-378a-3p inhibition and (B) overexpression constructs in ST486. Enrichment of (C) miR-378a-3p and (D) a randomly selected control miRNA, miR-181a-5p in the Ago2 immunoprecipitated (IP) fraction in comparison to the total (T) fraction. (E) Western blot results of Ago2 protein in T, flow through (FT), and IP samples using the anti-Ago2 antibody or the control anti-IgG antibody for immunoprecipitation.

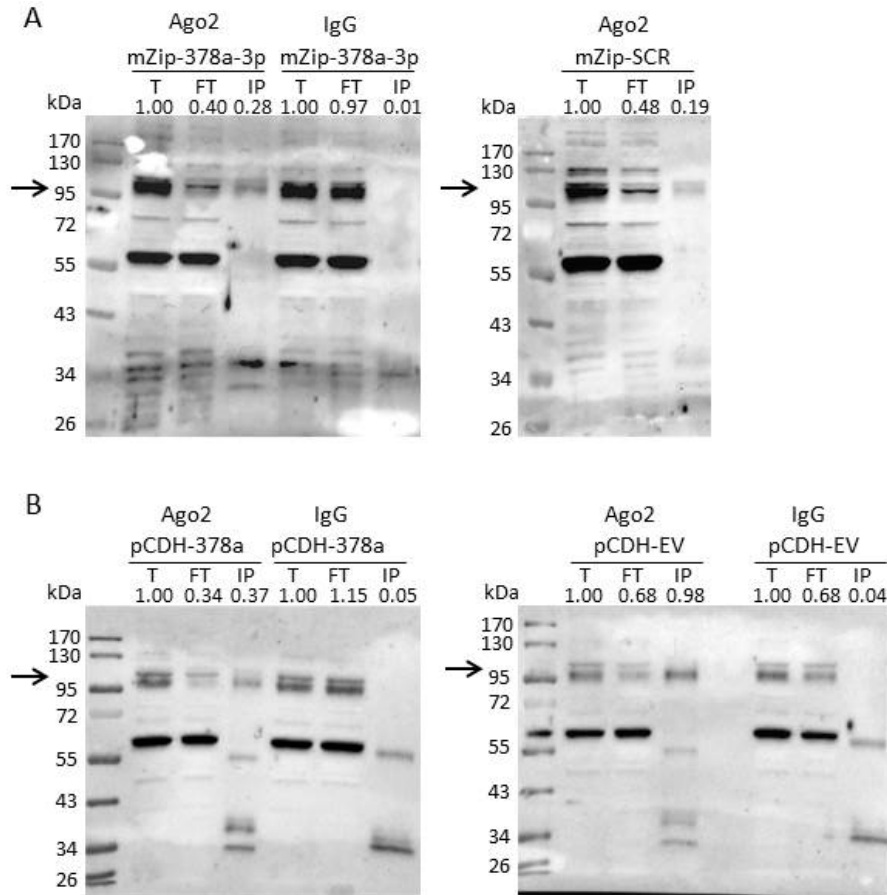

**Figure S4.** Uncropped western blot results for Ago2 protein in Total fraction (T), flow through (FT), and Ago2-immunoprecipitation fraction (IP) samples using the anti-Ago2 antibody or the control anti-IgG antibody for miR-378a-3p inhibition (A) and overexpression (B) experiments (see also Figure S3E). Arrows indicate the AGO2 protein. For each IP experiment the total fraction is set to 1.

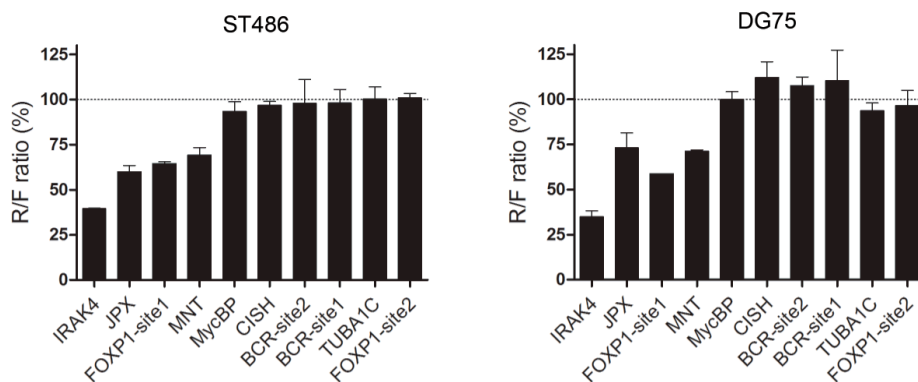

**Figure S5.** Results of the luciferase reporter assays for 10 putative miR-378a-3p binding sites identified in 8 Ago-2 IP enriched genes in (A) ST486 and (B) DG75. The 10 binding sites were cloned to the Psi-check-2 vector and co-transfected with miR-378a-3p mimics or negative control mimics to ST486 and DG75 BL cells. Binding of miR-378a-3p was confirmed for IRAK4, JPX, FOXP1-site1 and MNT in both cell lines.

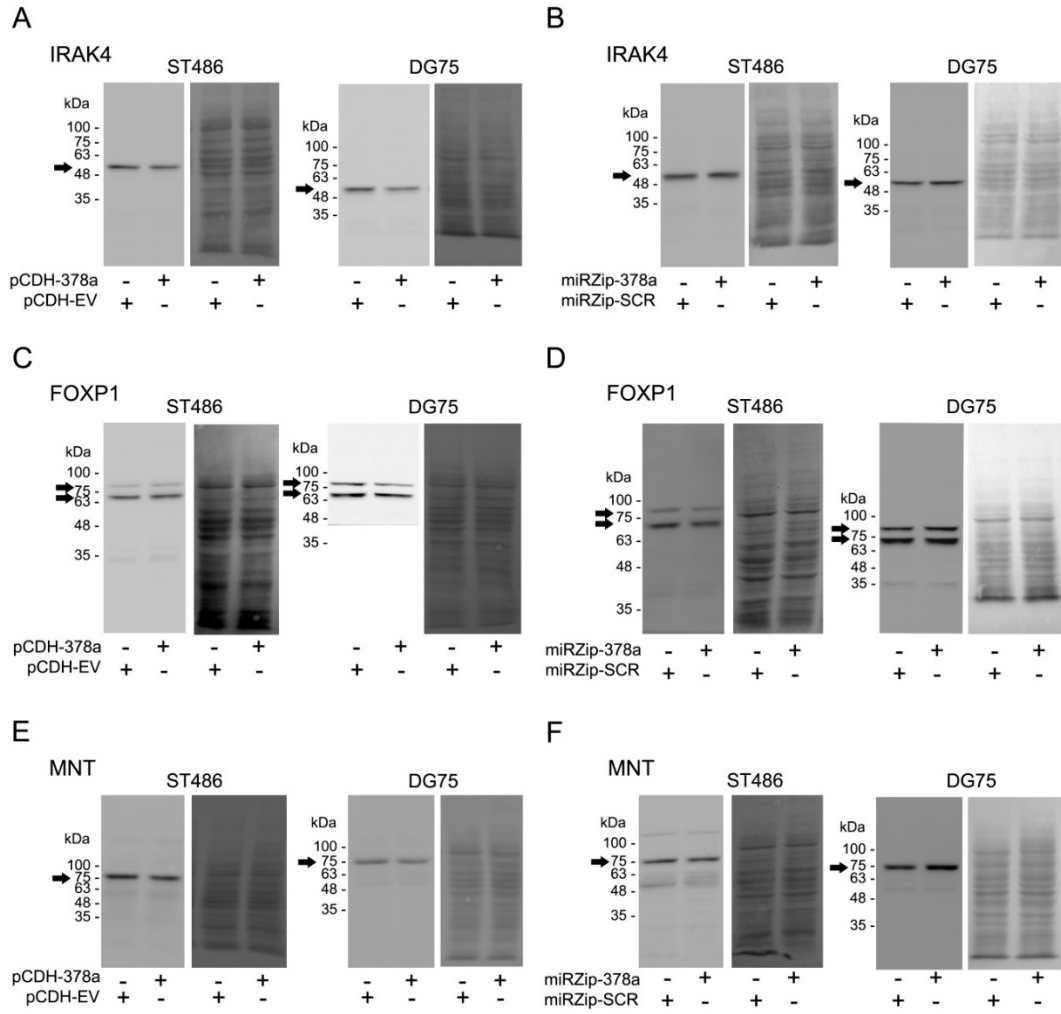

**Figure S6.** Uncropped western blot results for IRAK4 (A & B), FOXP1 (C & D) and MNT (E & F) as presented in Figure 4. Arrows indicate the protein of interest.

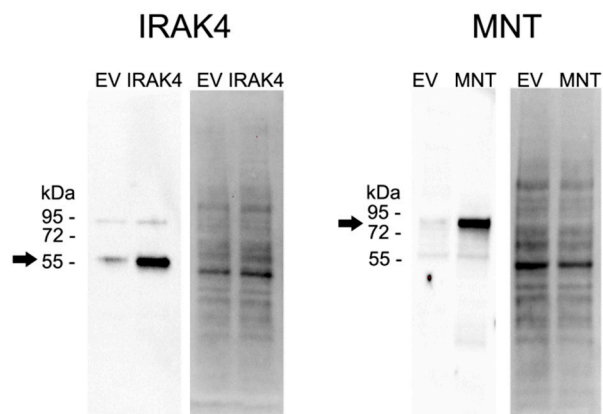

**Figure S7.** Uncropped western blot results for IRAK4 and MNT as presented in Figure 5. Arrows indicate the protein of interest.

5' **GATATCG**CCCTGATCAAGAGCGAAGAGGGCGAGAAAATGGTGCTTGAGAATAACTTCTTCGTCGAGA  
 CCATGCTCCCAAGCAAGATCATGCGGAAACTGGAGCCTGAGGAGTTCGCTGCCTACCTGGAGCCATTCA  
 AGGAGAAGGGCGAGGTTAGACGGCCTACCTCTCTCGGCTCGCGAGATCCCTCTCGTTAAGGGAGGCA  
 AGCCCGACGTC**GTGCAA**ATTGTCCGCAACTACAACGCCTACCTTCGGGCCAGCGACGATCTGCCTAAGA  
 TGTTTCATCGAGTCCGACCCTGGGTTCTTTTCCAACGCTATTGTTCGAGGGAGCTAAGAAGTTCCTAACA  
 CCGAGTTCGTGAAGGTGAAGGGCCTCCACTTCAGCCAGGAGGACGCTCCAGATGAAATGGGTAAGTACA  
 TCAAGAGCTTCGTGGAGCGCGTGCTGAAGAACGAGCAGTAATTCTAGGCGATCG**CTCGAG**3'

**Figure S8.** Sequence of the minigene used to generate a luciferase reporter vector without the putative miR-378a-3p binding site in the Renilla gene. The miR-378a seed sequence is shown in green, with the mutated nucleotides in red.

**Table S1.** Small RNA sequencing read summary.

| Sample | Total after Trimming |           | Mapping to Human Genome |            |           | Mapping to miRbase 21 |            |           |
|--------|----------------------|-----------|-------------------------|------------|-----------|-----------------------|------------|-----------|
|        | Reads                | Collapsed | Reads                   | Percentage | Collapsed | Reads                 | Percentage | Collapsed |
| ST486  | 12,728,371           | 679,193   | 9,215,947               | 72.4%      | 477,577   | 7,951,451             | 62.5%      | 19,074    |
| CA46   | 17,810,149           | 193,500   | 15,429,749              | 86.6%      | 45,386    | 13,035,709            | 73.2%      | 17,595    |
| DG75   | 5,553,807            | 295,796   | 4,542,877               | 81.8%      | 192,986   | 3,267,634             | 58.8%      | 16,337    |
| Ramos  | 9,001,167            | 566,396   | 6,671,654               | 74.1%      | 390,175   | 4,040,003             | 44.9%      | 14,824    |
| GC-1   | 9,234,697            | 357,071   | 6,993,299               | 75.7%      | 176,567   | 5,541,436             | 60.0%      | 15,998    |
| GC-2   | 9,637,128            | 620,514   | 5,225,051               | 54.2%      | 389,723   | 2,534,968             | 26.3%      | 13,262    |
| GC-3   | 6,758,291            | 524,000   | 4,660,685               | 69.0%      | 284,438   | 3,563,084             | 52.7%      | 15,879    |

**Table S2.** Taqman miRNA assays used for qRT-PCR validation.

| No. | miRNA       | Catalog No. | Sequence                      |
|-----|-------------|-------------|-------------------------------|
| 1   | miR-378a-3p | 2243        | 5'-ACUGGACUUGGAGUCAGAAGG-3'   |
| 2   | miR-28-5p   | 0411        | 5'-AAGGAGCUCACAGUCUAUUGAG-3'  |
| 3   | miR-155-5p  | 2623        | 5'-UAAAUGCUGAAUCGUGAUAGGGU-3' |
| 4   | miR-363-3p  | 1271        | 5'-AAUUGCACGGUAUCCAUCUGUA-3'  |
| 5   | miR-222-3p  | 2276        | 5'-AGCUACAUCUGGCUACUGGGU-3'   |
| 6   | miR-221-3p  | 1134        | 5'-AGCUACAUCUGGCUACUGGGUUU-3' |
| 7   | miR-30a-5p  | 0417        | 5'-UGUAAACAUCUCGACUGGAAG-3'   |
| 8   | miR-28-3p   | 2446        | 5'-CACUAGAUUGUGAGCUCCUGGA-3'  |

**Table S3.** Oligos for cloning miR-378a-3p binding sites from selected genes, wild type and with mutations in miR-378a-3p seed. Green letters indicate miR-378a-3p binding sites and red letters indicate the mismatches.

| NO. | Gene  | Sense(S)/ Anti-sence(AS) | 5' to 3'                                                    |
|-----|-------|--------------------------|-------------------------------------------------------------|
| 1   | FOXP1 | FOXP1-site1-MBS-S        | TCGAGAAGGGCCCCTGTCCTTAGTGACAACAGCCAACCACAGTCCAGATTTTGACCAT  |
|     |       | FOXP1-site1-MBS-AS       | GGCCATGGTCAAAATCTGGACTGTGGTTGGCTGTTGTCACTAAGGACAGGGGCCCTTC  |
|     |       | FOXP1-site1-MBS-mut-S    | TCGAGAAGGGCCCCTGTCCTTAGTGACAACAGCCAACCACACTGCTGATTTTGACCAT  |
|     |       | FOXP1-site1-MBS-mut-AS   | GGCCATGGTCAAAATCAGCAGTGTGGTTGGCTGTTGTCACTAAGGACAGGGGCCCTTC  |
|     |       | FOXP1-site2-MBS-S        | TCGAGCAATGGAGCATAACCAACAGCAACGAGAGTGACAGCAGTCCAGGCAGATCTCCT |
|     |       | FOXP1-site2-MBS-AS       | GGCCAGGAGATCTGCCTGGACTGCTGTCACTCTCGTTGCTGTTGGTATGCTCCATTGC  |
| 2   | IRAK4 | IRAK4-MBS-S              | TCGAAATCTTGAACAAAGCTATATGCCACCTGACTCCTCAAGTCCAGAAAATAAAAGT  |
|     |       | IRAK4-MBS-AS             | GGCCACTTTTATTTTCTGGACTTGAGGAGTCAGGTGGCATATAGCTTTGTTCAAGATT  |
|     |       | IRAK4-MBS-mut-S          | TCGAAATCTTGAACAAAGCTATATGCCACCTGACTCCTCAACTGCTGAAAATAAAAGT  |
|     |       | IRAK4-MBS-mut-AS         | GGCCACTTTTATTTTCTGGACTTGAGGAGTCAGGTGGCATATAGCTTTGTTCAAGATT  |
| 3   | JPX   | JPX-MBS-S                | TCGAGTTGCAAGGCGTCCGAAGTATGAGTCCACTAACAAAAGTCCAGAAACTCGCCAGT |
|     |       | JPX-MBS-AS               | GGCCACTGGCGAGTTTCTGGACTTTTGTAGTGGACTCATACTTCGGACGCCTTGCAAC  |
|     |       | JPX-MBS-mut-S            | TCGAGTTGCAAGGCGTCCGAAGTATGAGTCCACTAACAAAAGACGACAAACTCGCCAGT |
|     |       | JPX-MBS-mut-AS           | GGCCACTGGCGAGTTTGTTCGTCTTTTGTAGTGGACTCATACTTCGGACGCCTTGCAAC |
| 4   | MNT   | MNT-MBS-S                | TCGACATCGGGGGCCTGCAAATCTAGTGCCGAATGACTATGTCAGATTGGTGACGAT   |
|     |       | MNT-MBS-AS               | GGCCATCGTCACCAATCTGGACATAGTCATTCCGGCACTAGATTGCAGGCCCCCGATG  |
|     |       | MNT-MBS-mut-S            | TCGACATCGGGGGCCTGCAAATCTAGTGCCGAATGACTATGACGACATTGGTGACGAT  |
|     |       | MNT-MBS-mut-AS           | GGCCATCGTCACCAATGTCTGCATAGTCATTCCGGCACTAGATTGCAGGCCCCCGATG  |
| 5   | BCR   | BCR-site1-MBS-S          | TCGAGGCCACCTGAGGGCGCCCCAAGCCAGTTCATCTCGGAGTCCAGGCCTGGCCCTG  |
|     |       | BCR-site1-MBS-AS         | GGCCCAGGGCCAGGCCTGGACTCCGAGATGAACTGGCTTGGGGCGCCCTCAGGTGGCC  |
|     |       | BCR-site2-MBS-S          | TCGAACCTCACCTCCAGCGAGGAGGACTTCTCCTCTGGCCAGTCCAGCCGCGTGTCCC  |
|     |       | BCR-site2-MBS-AS         | GGCCGGGACACGCGGCTGGACTGGCCAGAGGAGAAGTCTCCTCGCTGGAGGTGAGGT   |
| 6   | CISH  | CISH-MBS-S               | TCGAGCGAGCCAACCCACCTCTATGCCCTGAGCCCTGGTAGTCCAGAGACCCCAACT   |
|     |       | CISH-MBS-AS              | GGCCAGTTGGGGTCTCTGGACTACCAGGGCTCAGGGCATAGAGGTGGGGTTGGCTCGC  |
| 7   | MYCBP | MYCBP-MBS-S              | TCGAGTGCCTCTTCTAGTCACAAGTTTGTGTTTGGAGGGGGTCCAGAAGATCATTCCC  |
|     |       | MYCBP-MBS-AS             | GGCCGGGAATGATCTTCTGGACCCCTCCAAAACAAACTTGTGACTAGAAGAGGCAC    |

|   |        |               |                                                            |                   |
|---|--------|---------------|------------------------------------------------------------|-------------------|
| 8 | TUBA1C | TUBA1C-MBS-S  | TCGACGTGAGTGCATCTCCATCCACGTTGGCCAGGCTGGT                   | GTCAGATTGGCAATGCC |
|   |        | TUBA1C-MBS-AS | GGCCGGCATTGCCAATCTGGACACCAGCCTGGCCAACGTGGATGGAGATGCACTCACG |                   |

---

**Publisher's Note:** MDPI stays neutral with regard to jurisdictional claims in published maps and institutional affiliations.

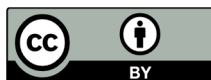

© 2020 by the authors. Licensee MDPI, Basel, Switzerland. This article is an open access article distributed under the terms and conditions of the Creative Commons Attribution (CC BY) license (<http://creativecommons.org/licenses/by/4.0/>).
